# Supplementary material for: The Impact of the Unstructured Contacts Component in Influenza Pandemic Modeling
Source: PubMed Central journal article supplement (PMC3278282; doi:10.1371/journal.pone.0001519), 2008-01-30
Supplement: pone.0001519.s006.pdf [file pone.0001519.s006.pdf]

Table S1: *Final attack rate (with standard deviation) for different  $G_0$  values obtained by varying the number of days spent for occasional long-distance trips in the models **M+T** and **L+T** and by varying the kernel parameter  $b$  (see Eq.3) in models **S**.*

| Model      | days | $b$ | AR           |              |              |
|------------|------|-----|--------------|--------------|--------------|
|            |      |     | $G_0 = 1.1$  | $G_0 = 1.4$  | $G_0 = 1.7$  |
| <b>M+T</b> | 5    | –   | 23.6 (0.029) | 49.2 (0.021) | 63.5 (0.010) |
|            | 10   | –   | 21.5 (0.037) | 47.7 (0.015) | 62.4 (0.014) |
|            | 20   | –   | 16.9 (0.103) | 44.6 (0.015) | 60.2 (0.014) |
|            | 30   | –   | 11.7 (0.767) | 41.5 (0.016) | 57.9 (0.012) |
| <b>L+T</b> | 5    | –   | 24.8 (0.040) | 49.3 (0.016) | 66.7 (0.010) |
|            | 10   | –   | 22.6 (0.026) | 47.9 (0.019) | 65.7 (0.012) |
|            | 20   | –   | 18.8 (0.053) | 44.9 (0.019) | 63.8 (0.011) |
|            | 30   | –   | 14.2 (1.086) | 42.2 (0.014) | 62.0 (0.015) |
| <b>S</b>   | –    | 0.6 | 19.6 (0.030) | 48.7 (0.015) | 64.8 (0.010) |
|            | –    | 1.2 | 19.6 (0.046) | 48.7 (0.019) | 64.8 (0.010) |
|            | –    | 1.9 | 19.6 (0.065) | 48.7 (0.038) | 64.8 (0.015) |
|            | –    | 2.6 | 19.6 (0.040) | 48.7 (0.016) | 64.8 (0.010) |
|            | –    | 5.2 | 19.6 (0.061) | 48.7 (0.018) | 64.8 (0.013) |
