# Supplementary material for: The Impact of the Unstructured Contacts Component in Influenza Pandemic Modeling
Source: PubMed Central journal article supplement (PMC3278282; doi:10.1371/journal.pone.0001519), 2008-01-30
Supplement: pone.0001519.s007.pdf [file pone.0001519.s007.pdf]

Table S2: *Basic reproductive numbers  $R_0$  (with standard deviation) for different  $G_0$  values obtained by varying the number of days spent for occasional long-distance trips in the models **M+T** and **L+T** and by varying the kernel parameter  $b$  (see Eq.3) in models **S**.*

| Model      | days | $b$ | $R_0$        |              |              |
|------------|------|-----|--------------|--------------|--------------|
|            |      |     | $G_0 = 1.1$  | $G_0 = 1.4$  | $G_0 = 1.7$  |
| <b>M+T</b> | 5    | –   | 1.34 (0.020) | 1.75 (0.010) | 2.11 (0.010) |
|            | 10   | –   | 1.29 (0.022) | 1.71 (0.010) | 2.11 (0.013) |
|            | 20   | –   | 1.19 (0.037) | 1.67 (0.011) | 2.04 (0.010) |
|            | 30   | –   | 1.19 (0.040) | 1.63 (0.018) | 1.97 (0.011) |
| <b>L+T</b> | 5    | –   | 1.27 (0.029) | 1.68 (0.015) | 2.08 (0.010) |
|            | 10   | –   | 1.29 (0.025) | 1.67 (0.011) | 2.10 (0.011) |
|            | 20   | –   | 1.27 (0.032) | 1.61 (0.018) | 2.02 (0.011) |
|            | 30   | –   | 1.21 (0.035) | 1.56 (0.021) | 1.97 (0.012) |
| <b>S</b>   | –    | 0.6 | 1.25 (0.035) | 1.73 (0.011) | 2.13 (0.010) |
|            | –    | 1.2 | 1.26 (0.027) | 1.74 (0.011) | 2.13 (0.011) |
|            | –    | 1.9 | 1.27 (0.033) | 1.72 (0.012) | 2.14 (0.011) |
|            | –    | 2.6 | 1.29 (0.038) | 1.72 (0.010) | 2.15 (0.012) |
|            | –    | 5.2 | 1.28 (0.034) | 1.73 (0.009) | 2.17 (0.009) |
