# Supplementary material for: The Impact of the Unstructured Contacts Component in Influenza Pandemic Modeling
Source: PubMed Central journal article supplement (PMC3278282; doi:10.1371/journal.pone.0001519), 2008-01-30
Supplement: pone.0001519.s008.pdf [file pone.0001519.s008.pdf]

Table S3: Peak day (with standard deviation) for different  $G_0$  values obtained by varying the number of days spent for occasional long-distance trips in the models **M+T** and **L+T** and by varying the kernel parameter  $b$  (see Eq.3) in models **S**.

| Model      | days | $b$ | Peak Day      |              |             |
|------------|------|-----|---------------|--------------|-------------|
|            |      |     | $G_0 = 1.1$   | $G_0 = 1.4$  | $G_0 = 1.7$ |
| <b>M+T</b> | 5    | –   | 273.3 ( 24.0) | 148.2 (11.7) | 101.6 (8.3) |
|            | 10   | –   | 288.9 ( 25.4) | 136.6 (10.2) | 98.0 (6.8)  |
|            | 20   | –   | 344.3 ( 28.7) | 149.1 (15.0) | 99.0 (5.2)  |
|            | 30   | –   | 417.0 ( 12.7) | 156.4 (13.7) | 103.3 (7.6) |
| <b>L+T</b> | 5    | –   | 287.1 ( 18.2) | 148.2 (11.7) | 99.4 (6.4)  |
|            | 10   | –   | 388.3 (148.2) | 142.8 (11.5) | 98.9 (7.7)  |
|            | 20   | –   | 326.0 ( 26.7) | 141.1 (10.2) | 101.1 (6.9) |
|            | 30   | –   | 416.3 ( 24.0) | 147.9 (11.8) | 104.9 (7.8) |
| <b>S</b>   | –    | 0.6 | 315.6 ( 34.2) | 126.3 ( 7.2) | 88.5 (6.5)  |
|            | –    | 1.2 | 295.7 ( 21.3) | 123.2 ( 8.8) | 86.6 (6.3)  |
|            | –    | 1.9 | 298.3 ( 25.5) | 126.4 ( 9.6) | 89.6 (5.8)  |
|            | –    | 2.6 | 292.8 ( 26.1) | 122.1 (14.0) | 85.5 (6.6)  |
|            | –    | 5.2 | 286.3 ( 24.9) | 129.2 (16.4) | 87.4 (8.2)  |
