# Supplementary material for: The Impact of the Unstructured Contacts Component in Influenza Pandemic Modeling
Source: PubMed Central journal article supplement (PMC3278282; doi:10.1371/journal.pone.0001519), 2008-01-30
Supplement: pone.0001519.s009.pdf [file pone.0001519.s009.pdf]

Table S4: *Percentage of different household types. \* with additional household member.*

| <u>household type</u>    | <u>percentage</u> |
|--------------------------|-------------------|
| single without children  | 25.8              |
| single with children     | 7.9               |
| single with children*    | 0.6               |
| couple without children  | 19.7              |
| couple without children* | 1.3               |
| couple with children     | 40.0              |
| couple with children*    | 1.9               |
| adults living together   | 1.6               |
| more household groups    | 1.2               |
