# Supplementary material for: The Impact of the Unstructured Contacts Component in Influenza Pandemic Modeling
Source: PubMed Central journal article supplement (PMC3278282; doi:10.1371/journal.pone.0001519), 2008-01-30
Supplement: pone.0001519.s010.pdf [file pone.0001519.s010.pdf]

Table S5: *Household size by type (in percentage). \* with additional household member.*

| household type           | household size |      |      |      |      |          |
|--------------------------|----------------|------|------|------|------|----------|
|                          | 1              | 2    | 3    | 4    | 5    | $\geq 6$ |
| single without children  | 100            | 0    | 0    | 0    | 0    | 0        |
| single with children     | 0              | 68.9 | 25   | 6.1  | 0    | 0        |
| single with children*    | 0              | 0    | 68.9 | 25   | 6.1  | 0        |
| couple without children  | 0              | 100  | 0    | 0    | 0    | 0        |
| couple without children* | 0              | 0    | 100  | 0    | 0    | 0        |
| couple with children     | 0              | 0    | 45.1 | 43.8 | 9.5  | 1.6      |
| couple with children*    | 0              | 0    | 0    | 45.1 | 43.8 | 11.1     |
| adults living together   | 0              | 78.5 | 21.5 | 0    | 0    | 0        |
| more household groups    | 0              | 0    | 0    | 49.3 | 44.3 | 6.4      |
